# Supplementary material
Source: ML conference proceedings conference paper supplement (https://proceedings.mlr.press/v108/rakhshan20a.html)
Supplement: Supplementary file 1 [file rakhshan20a-supp.pdf]

# Tensorized Random Projections

## (Supplementary Material)

### A Proof of the Theorems for the CP case

#### A.1 Proof of Theorem 1: CP case

**Theorem.** Let  $\mathcal{X} \in \mathbb{R}^{d_1 \times d_2 \times \dots \times d_N}$ . The random projection maps  $f_{\text{TT}(R)}$  and  $f_{\text{CP}(R)}$  (see Definitions 1 and 2) satisfy the following properties:

- $\mathbb{E} [\|f_{\text{CP}(R)}(\mathcal{X})\|_2^2] = \mathbb{E} [\|f_{\text{TT}(R)}(\mathcal{X})\|_2^2] = \|\mathcal{X}\|_F^2$ ,
- $\text{Var} (\|f_{\text{TT}(R)}(\mathcal{X})\|_2^2) \leq \frac{1}{k} (3 (1 + \frac{2}{R})^{N-1} - 1) \|\mathcal{X}\|_F^4$ ,
- $\text{Var} (\|f_{\text{CP}(R)}(\mathcal{X})\|_2^2) \leq \frac{1}{k} (3^{N-1} (1 + \frac{2}{R}) - 1) \|\mathcal{X}\|_F^4$ .

*Proof. Expected isometry.* We start by showing that  $f_{\text{CP}(R)}$  is an expected isometry, i.e. that  $\mathbb{E} \|f_{\text{CP}(R)}(\mathcal{X})\|_2^2 = \|\mathcal{X}\|_F^2$ . Let  $y_i = \langle [\mathbf{A}_i^1, \mathbf{A}_i^2, \dots, \mathbf{A}_i^N], \mathcal{X} \rangle$  and  $\mathbf{y} = [y_1, y_2, \dots, y_k]$ . With these definitions we have  $f_{\text{CP}(R)}(\mathcal{X}) = \frac{1}{\sqrt{k}} \mathbf{y}$  and it is thus sufficient to find  $\mathbb{E}[y_1^2]$ . To lighten the notation, let  $\mathbf{A}^n = \mathbf{A}_1^n$  for each  $n \in [N]$  and let  $\mathcal{T} = [[\mathbf{A}^1, \mathbf{A}^2, \dots, \mathbf{A}^N]]$ . We have

$$\begin{aligned} \mathbb{E}[y_1^2] &= \mathbb{E}[\langle \mathcal{T}, \mathcal{X} \rangle^2] = \mathbb{E}[\langle \mathcal{T} \otimes \mathcal{T}, \mathcal{X} \otimes \mathcal{X} \rangle] \\ &= \langle \mathbb{E}[\mathcal{T} \otimes \mathcal{T}], \mathcal{X} \otimes \mathcal{X} \rangle. \end{aligned}$$

Using the fact that the factor matrices  $\mathbf{A}^n$  are independent, we have

$$\begin{aligned} \mathbb{E}[\mathcal{T} \otimes \mathcal{T}] &= \mathbb{E}[[\mathbf{A}^1 \otimes \mathbf{A}^1, \dots, \mathbf{A}^N \otimes \mathbf{A}^N]] \\ &= [[\mathbb{E}[\mathbf{A}^1 \otimes \mathbf{A}^1], \dots, \mathbb{E}[\mathbf{A}^N \otimes \mathbf{A}^N]]]. \end{aligned}$$

Now, for  $n \in [N]$ , since the entries of each factor matrix  $\mathbf{A}^n$  are i.i.d. Gaussian random variables with mean 0 and variance  $(\frac{1}{R})^{\frac{1}{N}}$ , we have

$$\mathbb{E}[\mathbf{A}^n \otimes \mathbf{A}^n] = \left(\frac{1}{R}\right)^{\frac{1}{N}} \text{vec}(\mathbf{I}_{d_n}) \circ \text{vec}(\mathbf{I}_R).$$

One can then show that

$$\mathbb{E}[\mathcal{T} \otimes \mathcal{T}] = \text{vec}(\mathbf{I}_{d_1}) \circ \dots \circ \text{vec}(\mathbf{I}_{d_N}),$$

which implies that

$$\mathbb{E}[y_1^2] = \langle \mathbb{E}[\mathcal{T} \otimes \mathcal{T}], \mathcal{X} \otimes \mathcal{X} \rangle = \|\mathcal{X}\|_F^2,$$

from which  $\mathbb{E} \|f_{\text{CP}(R)}(\mathcal{X})\|_2^2 = \|\mathcal{X}\|_F^2$  directly follows.

**Bound on the variance of  $f_{\text{CP}(R)}$ .** Similar to TT case, in order to bound the variance of  $\|\mathbf{y}\|_2^4$  we need to bound  $\mathbb{E}[\|\mathbf{y}\|_2^4]$ . We have

$$\mathbb{E}[\|\mathbf{y}\|_2^4] = \sum_{i=1}^k \mathbb{E}[y_i^4] + \sum_{i \neq j} \mathbb{E}[y_i^2 y_j^2].$$

Since  $y_i$  and  $y_j$  are independent whenever  $i \neq j$  and  $\mathbb{E}[y_i^2] = \|\mathcal{X}\|_F^2$  for all  $i$ , the second summand is equal to  $k(k-1) \|\mathcal{X}\|_F^4$ . We now derive a bound on  $\mathbb{E}[y_1^4]$ . First define the tensor  $\mathcal{S}^n$  of order  $2(n-1)$  and shape  $\underbrace{R \times R \times \dots \times R}_{n-1} \times d_1 \times d_2 \times \dots \times d_{n-1}$  for any  $2 \leq n < N$  by

$$\mathcal{S}_{r_1, r_2, \dots, r_{n-1}, i_1, i_2, \dots, i_{n-1}}^n = \sum_{r_n, \dots, r_N} \sum_{i_n, \dots, i_N} (\mathbf{A}^n)_{i_n r_n} (\mathbf{A}^{n+1})_{i_{n+1} r_{n+1}} \dots (\mathbf{A}^N)_{i_N r_N} \mathcal{I}_{r_1, \dots, r_N} \mathcal{X}_{i_1, \dots, i_N},$$

where  $\mathcal{I} \in (\mathbb{R}^R)^{\otimes N}$  is the  $N$ th order identity tensor, i.e.,  $\mathcal{I}_{r_1, \dots, r_N} = 1$  if  $r_1 = \dots = r_N$  and 0 otherwise. In some sense,  $\mathcal{S}^n$  is the tensor obtained by removing the first  $n-1$  factor matrices from the computation of  $y_1 = \langle [\mathbf{A}^1, \mathbf{A}^2, \dots, \mathbf{A}^N], \mathcal{X} \rangle$ . With this definition one can check that

- $\langle [\mathbf{A}^1, \mathbf{A}^2, \dots, \mathbf{A}^N], \mathcal{X} \rangle = \langle (\mathbf{A}^1)^\top, \mathbf{S}^2 \rangle$ ,
- $(\mathcal{S}_{(1, \dots, N-1)}^N)^\top = (\mathcal{X}_{(N)})^\top \mathbf{A}^N \mathcal{I}_{(1)}$  (recall that  $(\mathcal{S}^N)_{(1, \dots, N-1)} \in \mathbb{R}^{R^{N-1} \times d_1 \dots d_{N-1}}$  denotes the matricization of  $\mathcal{S}^N$  obtained by mapping its first  $N-1$  modes to rows and the other ones to columns).
- $\text{vec}(\mathcal{S}^n) = ((\mathcal{S}^{n+1})_{(1, 2n)})^\top \text{vec}(\mathbf{A}^n)$  for each  $n \in [N-1]$ .

Using Lemma 3 we obtain

$$\begin{aligned} \mathbb{E} y_1^4 &= \mathbb{E} \langle [\mathbf{A}^1, \mathbf{A}^2, \dots, \mathbf{A}^N], \mathcal{X} \rangle^4 = \mathbb{E} \langle \text{vec}((\mathbf{A}^1)^\top), \text{vec}(\mathbf{S}^2) \rangle^4 = 3R^{-\frac{2}{N}} \mathbb{E} \|\text{vec}(\mathbf{S}^2)\|_F^4 \\ &= 3R^{-\frac{2}{N}} \mathbb{E} \|((\mathcal{S}^3)_{(1,4)})^\top \text{vec}(\mathbf{A}^2)\|_F^4. \end{aligned}$$

Using successive applications of Lemma 4 it follows that

$$\begin{aligned} \mathbb{E} y_1^4 &= 3R^{-\frac{2}{N}} \mathbb{E} \|((\mathcal{S}^3)_{(1,4)})^\top \text{vec}(\mathbf{A}^2)\|_F^4 \\ &\leq 3^2 R^{-\frac{4}{N}} \mathbb{E} \|((\mathcal{S}^3)_{(1,4)})\|_F^4 = 3^2 R^{-\frac{4}{N}} \mathbb{E} \|\text{vec}(\mathcal{S}^3)\|_F^4 = 3^2 R^{-\frac{4}{N}} \mathbb{E} \|((\mathcal{S}^4)_{(1,6)})^\top \text{vec}(\mathbf{A}^3)\|_F^4 \\ &\leq 3^3 R^{-\frac{6}{N}} \mathbb{E} \|((\mathcal{S}^4)_{(1,6)})\|_F^4 = 3^3 R^{-\frac{6}{N}} \mathbb{E} \|\text{vec}(\mathcal{S}^4)\|_F^4 \\ &\leq \dots \\ &\leq 3^{N-1} R^{-\frac{2(N-1)}{N}} \mathbb{E} \|\text{vec}(\mathcal{S}^N)\|_F^4 = 3^{N-1} R^{-\frac{2(N-1)}{N}} \mathbb{E} \|((\mathcal{S}^N)_{(1, \dots, N-1)})^\top\|_F^4 \\ &= 3^{N-1} R^{-\frac{2(N-1)}{N}} \mathbb{E} \|(\mathcal{X}_{(N)})^\top \mathbf{A}^N \mathcal{I}_{(1)}\|_F^4 = 3^{N-1} R^{-\frac{2(N-1)}{N}} \mathbb{E} \|(\mathcal{X}_{(N)})^\top \mathbf{A}^N\|_F^4 \\ &\leq 3^{N-1} R^{-2} R(R+2) \|\mathcal{X}\|_F^4 \\ &= 3^{N-1} \left(1 + \frac{2}{R}\right) \|\mathcal{X}\|_F^4, \end{aligned}$$

where we used the equality  $\|\mathcal{T} \mathcal{I}_{(1)}\|_F^2 = \|\mathcal{T}\|_F^2$  for any tensor  $\mathcal{T}$  (which follows from the fact that  $\mathcal{I}_{(1)}(\mathcal{I}_{(1)})^\top = \mathbf{I}$ ) for the penultimate equality.

Similar to proof of Theorem 1 for  $f_{\text{TT}(R)}$  map, we obtain

$$\mathbb{E} \|\mathbf{y}\|_2^4 = \sum_{i=1}^k \mathbb{E} y_i^4 + \sum_{i \neq j} \mathbb{E} y_i^2 y_j^2 \leq k \left( 3^{N-1} \left(1 + \frac{2}{R}\right) \|\mathcal{X}\|_F^4 \right) + k(k-1) \|\mathcal{X}\|_F^4.$$

Finally,

$$\begin{aligned} \text{Var} \left( \|f_{\text{CP}(R)}(\mathcal{X})\|_2^2 \right) &= \text{Var} \left( \left\| \frac{1}{\sqrt{k}} \mathbf{y} \right\|_2^2 \right) = \frac{1}{k^2} \mathbb{E} \left( \|\mathbf{y}\|_2^4 \right) - \frac{1}{k^2} \mathbb{E} \left( \|\mathbf{y}\|_2^2 \right)^2 = \frac{1}{k^2} \mathbb{E} \|\mathbf{y}\|_2^4 - \|\mathcal{X}\|_F^4 \\ &\leq \frac{1}{k^2} \left[ k \left( 3^{N-1} \left(1 + \frac{2}{R}\right) \|\mathcal{X}\|_F^4 \right) + k(k-1) \|\mathcal{X}\|_F^4 \right] - \|\mathcal{X}\|_F^4 \\ &\leq \frac{1}{k} \left( 3^{N-1} \left(1 + \frac{2}{R}\right) - 1 \right) \|\mathcal{X}\|_F^4. \end{aligned}$$

□

## A.2 Proof of Theorem 2: CP case

Theorem 2 for the map  $f_{\text{CP}(R)}$  directly follows from the following concentration bound.

**Theorem.** *Let  $\mathcal{X} \in \mathbb{R}^{d_1 \times d_2 \times \dots \times d_N}$ . There exist absolute constants  $C$  and  $\tilde{K} > 0$  such that the random projection map  $f_{\text{CP}(R)}$  (see Definition 2) satisfies*

$$\mathbb{P} \left( \left| \|f_{\text{CP}(R)}(\mathcal{X})\|_2^2 - \|\mathcal{X}\|_F^2 \right| \geq \varepsilon \|\mathcal{X}\|_F^2 \right) \leq C \exp \left[ -C_1 \frac{(\sqrt{k}\varepsilon)^{\frac{1}{N}}}{(3^{N-1}\tilde{K})^{\frac{1}{2N}}(1+2/R)^{\frac{1}{2N}}} \right].$$

*Proof.* By CP part of Theorem 1, recall

$$\mathbb{E} \|f_{\text{CP}(R)}(\mathcal{X})\|_2^2 = \|\mathcal{X}\|_F^2,$$

and

$$\text{Var} \left( \|f_{\text{CP}(R)}(\mathcal{X})\|_2^2 \right) \leq \frac{1}{k} \left( 3^{N-1} \left( 1 + \frac{2}{R} \right) - 1 \right) \|\mathcal{X}\|_F^4.$$

Since  $\|f_{\text{CP}(R)}(\mathcal{X})\|_2^2$  is an order  $2N$  polynomial of the entries of the matrices  $\mathbf{A}_i^1, \dots, \mathbf{A}_i^N$  for  $i \in [k]$  we can apply Theorem 6 to obtain

$$\mathbb{P} \left( \left| \|f_{\text{CP}(R)}(\mathcal{X})\|_2^2 - \|\mathcal{X}\|_F^2 \right| \geq \lambda \right) \leq C \exp \left[ - \left( \frac{\lambda^2}{\tilde{K} \text{Var} \left( \|f_{\text{CP}(R)}(\mathcal{X})\|_2^2 \right)} \right)^{\frac{1}{2N}} \right],$$

where  $C = e^2$  and  $\tilde{K}$  are absolute constants. Using the fact that

$$\text{Var} \left( \|f_{\text{CP}(R)}(\mathcal{X})\|_2^2 \right) \leq \frac{3^{N-1}}{k} (1 + 2/R) \|\mathcal{X}\|_F^4,$$

and letting  $\lambda = \varepsilon \|\mathcal{X}\|_F^2$  we obtain

$$\begin{aligned} \mathbb{P} \left( \left| \|f_{\text{CP}(R)}(\mathcal{X})\|_2^2 - \|\mathcal{X}\|_F^2 \right| \geq \varepsilon \|\mathcal{X}\|_F^2 \right) &\leq C \exp \left[ - \left( \frac{k\varepsilon^2 \|\mathcal{X}\|_F^4}{\tilde{K} 3^{N-1} (1 + 2/R) \|\mathcal{X}\|_F^4} \right)^{\frac{1}{2N}} \right] \\ &\leq C \exp \left[ - \frac{(\sqrt{k}\varepsilon)^{\frac{1}{N}}}{(3^{N-1}\tilde{K})^{\frac{1}{2N}}(1+2/R)^{\frac{1}{2N}}} \right]. \end{aligned}$$

□

## B Additional Experimental Results

### B.1 Pairwise Distance Estimation

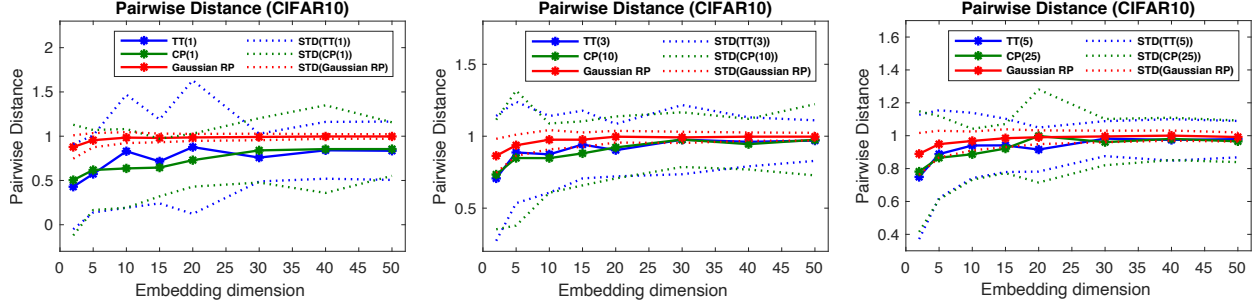

Figure 3: Comparison of tensorized random projections with Gaussian random projections on CIFAR-10 data for different values of the rank parameter: (left) rank 1, (middle) rank 3-10, (right) rank 5-25.

We compare the tensorized projection maps  $f_{\text{TT}(R)}$  and  $f_{\text{CP}(R)}$  with classical Gaussian RP on CIFAR-10 image data for different values of the rank parameter  $R$ . We reshape the first  $n=50$  vectors (of size  $32 \times 32 \times 4$ ) of CIFAR-10 to  $4 \times 4 \times 4 \times 4 \times 3$  tensors, normalize them and compare the pairwise distance  $\frac{1}{n(n-1)} \sum_{1 \leq i \neq j \leq n} \frac{\|f(\mathbf{x}_i) - f(\mathbf{x}_j)\|_2}{\|\mathbf{x}_i - \mathbf{x}_j\|_2}$  and standard deviation for different projection sizes  $k$  over 100 trials. The results are reported in Figure 3 where we see that tensorized random projection maps perform competitively with classical Gaussian random projections.

### B.2 Time Evaluation

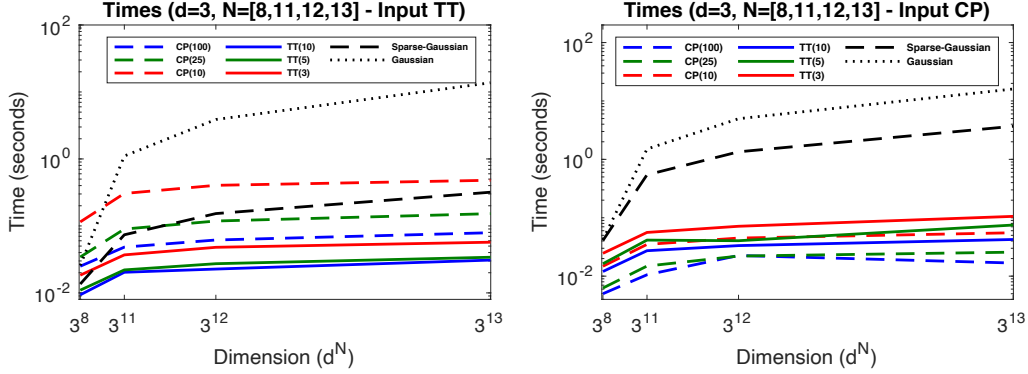

Figure 4: Comparison of embedding time between tensorized, Gaussian and very sparse Gaussian RP for the medium-order case with different number of modes ( $d = 3, N \in \{8, 11, 12, 13\}$ ) when the input is given in the TT format (left) or CP format (right).

We report the average running time with respect to the input dimension  $d^N$  for the medium-order case with different number of modes ( $d = 3, N \in \{8, 11, 12, 13\}$ ) in Figure 4, when the input tensor  $\mathcal{X}$  is either as a TT or CP tensor of rank 10. We can see that  $f_{\text{TT}(R)}$  is more efficient when the input is in TT format. However,  $f_{\text{CP}(R)}$  performs better when the input is in the CP format (though the computational gain of  $f_{\text{CP}(R)}$  in this case is considerably smaller than the one of  $f_{\text{TT}(R)}$  in the previous case). We can see that by increasing the dimension  $f_{\text{TT}(R)}$  performs close to  $f_{\text{CP}(R)}$  even when the input is in CP and it is faster than classical Gaussian RPs in both cases (which is not true for  $f_{\text{CP}(100)}$ ).
